# Supplementary material for: Unusual enhancement in efficiency of DSSCs upon modifying photoanodes with reduced graphene oxide
Source: Royal Society of Chemistry journal article supplement (doi:10.1039/d2ra05375f), 2022-01-01
Supplement: d2ra05375f1.pdf [file d2ra05375f1.pdf]

Electronic Supplementary Information (ESI)

**Unusual enhancement in efficiency of DSSC upon  
modifying photoanode with reduced graphene oxide**

Sujit Bhand, Plawan Kumar Jha and Nirmalya Ballav\*

Department of Chemistry, Indian Institute of Science Education and Research (IISER),

Dr. Homi Bhabha Road, Pashan, Pune 411008, India

\*E-mail: [nballav@iiserpune.ac.in](mailto:nballav@iiserpune.ac.in)

# Table of contents

| Sr No | Name                                                                                                                                                                                                                                                                                                                                                               | Page No |
|-------|--------------------------------------------------------------------------------------------------------------------------------------------------------------------------------------------------------------------------------------------------------------------------------------------------------------------------------------------------------------------|---------|
| 1     | <b>Table S1</b> Literature survey of different materials used for enhancement in efficiencies of DSSC                                                                                                                                                                                                                                                              | S3      |
| 2     | <b>Figure S1</b> FESEM images of spin coated rGO1 and rGO2 on FTO after calcination at 500 °C in open air respectively (Calcination was carried out to check sustainability of rGO materials at 500 °C which is used for photoanode fabrication) a) and c) shows particle dispersed of rGO1 and rGO2 respectively and b) and d) are zoomed in images for the same. | S5      |
| 3     | <b>Figure S2</b> a) Raman spectra of rGO1 and rGO2 where RT indicate before heating and HT after heating calcination in at at 500 °C in open air respectively. b) Absorbance spectra of blank FTO (D1), TiCl <sub>4</sub> treated (D2), spin coated rGO1 (D3) and rGO2 (D4).                                                                                       | S6      |
| 4     | <b>Figure S3</b> Cross-sectional FESEM image of the photoanode of D3 device                                                                                                                                                                                                                                                                                        | S7      |
| 5     | <b>Figure S4</b> FESEM image of the photoanode of D3 device                                                                                                                                                                                                                                                                                                        | S8      |
| 6     | <b>Figure S5</b> % PCE values of D1, D2, D3 and D4 (10 devices each)                                                                                                                                                                                                                                                                                               | S9      |
| 7     | <b>Figure S6</b> Solid-state UV-vis spectra of photoanodes of D1, D2, D3 and D4                                                                                                                                                                                                                                                                                    | S10     |
| 8     | <b>Figure S7</b> UV-vis spectra of de-absorbed dye from photoanodes of D1, D2, D3 and D4                                                                                                                                                                                                                                                                           | S11     |
| 9     | <b>Reference</b>                                                                                                                                                                                                                                                                                                                                                   | S12     |

**Table S1** Literature survey of different materials used for enhancement in efficiencies of DSSC

| Sr. No. | Materials used for Photoanode                     | PCE (%) | Features of Materials used to improve efficiency in DSSC                                                                                                                                                                                                                                                                                                                                                            | Ref. |
|---------|---------------------------------------------------|---------|---------------------------------------------------------------------------------------------------------------------------------------------------------------------------------------------------------------------------------------------------------------------------------------------------------------------------------------------------------------------------------------------------------------------|------|
| 1       | TiO <sub>2</sub>                                  | 5.01    | <ul style="list-style-type: none"> <li>● <b>Active material used- 2D Graphene oxide</b></li> <li>● <b>Active material preparation method-</b> Graphite with KMnO<sub>4</sub> as reducing agent</li> <li>● <b>Anode fabrication-</b> 0.6 % weight mixed during TiO<sub>2</sub> paste preparation</li> <li>● Morphology- 2D</li> <li>● 2D materials is more beneficial when compared with 1D</li> </ul>               | 1    |
|         | Grapheneoxide in TiO <sub>2</sub>                 | 6.97    |                                                                                                                                                                                                                                                                                                                                                                                                                     |      |
| 2       | TiO <sub>2</sub>                                  | 5.78    | <ul style="list-style-type: none"> <li>● <b>Active material used- RGO</b></li> <li>● <b>Active material preparation method-</b> single-layer graphene oxide (SGO) to RGO by heat treatment</li> <li>● <b>Anode fabrication-</b> 3 % weight mixed during TiO<sub>2</sub> paste preparation</li> <li>● Morphology- not explained</li> </ul>                                                                           | 2    |
|         | RGO in TiO <sub>2</sub>                           | 7.49    |                                                                                                                                                                                                                                                                                                                                                                                                                     |      |
| 3       | TiO <sub>2</sub>                                  | 0.32    | <ul style="list-style-type: none"> <li>● <b>Active material used- Graphene sheet</b></li> <li>● <b>Active material preparation method-</b> Graphite to GO and further exploited to Graphene sheets via sonication</li> <li>● <b>Anode fabrication-</b> 0.01-0.05 mg/mL mixed in TiO<sub>2</sub> suspension</li> <li>● Morphology- single sheets</li> </ul>                                                          | 3    |
|         | Graphene sheets in TiO <sub>2</sub>               | 1.68    |                                                                                                                                                                                                                                                                                                                                                                                                                     |      |
| 4       | TiO <sub>2</sub>                                  | 8.45    | <ul style="list-style-type: none"> <li>● <b>Active material used- Graphene Purchased</b></li> <li>● <b>Active material preparation method-</b> NA</li> <li>● <b>Anode fabrication-</b> 0.1% Graphene in mixed in TiO<sub>2</sub> suspension</li> <li>● Morphology- agglomerate of Graphene and TiO<sub>2</sub></li> </ul>                                                                                           | 4    |
|         | Graphene in TiO <sub>2</sub>                      | 9.45    |                                                                                                                                                                                                                                                                                                                                                                                                                     |      |
| 5       | ZnO                                               | 2.31    | <ul style="list-style-type: none"> <li>● <b>Active material used- Graphene oxide</b></li> <li>● <b>Active material preparation method-</b> Graphite to GO by modified Hummers method</li> <li>● <b>Anode fabrication-</b> 1.2 wt % of graphene scaffolds incorporated into ZnO hierarchically structured nanoparticle (HSN) (In situ generation)</li> </ul>                                                         | 5    |
|         | Grapheneoxide in ZnO                              | 3.19    |                                                                                                                                                                                                                                                                                                                                                                                                                     |      |
| 6       | TiO <sub>2</sub>                                  | 4.2     | <ul style="list-style-type: none"> <li>● <b>Active material used- rGO</b></li> <li>● <b>Active material preparation method-</b> Graphite to GO by modified Hummers methods</li> <li>● <b>Anode fabrication-</b> 0.75 Wt% mixed during TiO<sub>2</sub> paste preparation</li> </ul>                                                                                                                                  | 6    |
|         | rGO in TiO <sub>2</sub>                           | 5.5     |                                                                                                                                                                                                                                                                                                                                                                                                                     |      |
| 7       | TiO <sub>2</sub>                                  | 4.54    | <ul style="list-style-type: none"> <li>● <b>Active material used- multi-walled carbon nanotubes</b></li> <li>● <b>Active material preparation method-</b> Graphite to multi-walled carbon nanotubes by Staudenmaier's method followed by heat treatment</li> <li>● <b>Anode fabrication-</b> composite of multi-walled carbon nanotubes pastes were prepared for doctor blading TiO<sub>2</sub> particle</li> </ul> | 7    |
|         | multi-walled carbon nanotubes in TiO <sub>2</sub> | 6.11    |                                                                                                                                                                                                                                                                                                                                                                                                                     |      |
| 8       | TiO <sub>2</sub>                                  | 1.79    | <ul style="list-style-type: none"> <li>● <b>Active material used- Graphene oxide</b></li> <li>● <b>Active material preparation method-</b> Modified Hummers methods</li> <li>● <b>Anode fabrication-</b> 0.21 wt % GO</li> </ul>                                                                                                                                                                                    | 8    |
|         | Grapheneoxide in TiO <sub>2</sub>                 | 2.78    |                                                                                                                                                                                                                                                                                                                                                                                                                     |      |

|    |                                     |      |                                                                                                                                                                                                                                                                                                                                                                        |              |
|----|-------------------------------------|------|------------------------------------------------------------------------------------------------------------------------------------------------------------------------------------------------------------------------------------------------------------------------------------------------------------------------------------------------------------------------|--------------|
|    |                                     |      | mixed with TiO <sub>2</sub> particle                                                                                                                                                                                                                                                                                                                                   |              |
| 9  | TiO <sub>2</sub> Fibers             | 6.3  | <ul style="list-style-type: none"> <li>● <b>Active material- Graphene Purchased</b></li> <li>● <b>Active material preparation method- NA</b></li> <li>● <b>Anode fabrication-</b> Electrospinning of conductive TiO<sub>2</sub>-graphene composites in combination with PVP as a carrier solution resulting in well-defined and structurally stable fibers.</li> </ul> | 9            |
|    | Graphene in TiO <sub>2</sub> Fibers | 7.6  |                                                                                                                                                                                                                                                                                                                                                                        |              |
| 10 | TiO <sub>2</sub>                    | 6.08 | <ul style="list-style-type: none"> <li>● <b>Active material used- rGO</b></li> <li>● <b>Active material preparation method-</b> Chemically reduced graphene oxide</li> <li>● <b>Anode fabrication-</b> Simple spin coating of RGO at FTO/TiO<sub>2</sub> interface</li> </ul>                                                                                          | Present work |
|    | rGO spincoated at Interface         | 8.19 |                                                                                                                                                                                                                                                                                                                                                                        |              |
| 11 | TiO <sub>2</sub>                    | 6.08 | <ul style="list-style-type: none"> <li>● <b>Active material used- rGO</b></li> <li>● <b>Active material preparation method-</b> Chemically reduced graphene oxide</li> <li>● <b>Anode fabrication-</b> Simple spin coating of RGO at FTO/ TiO<sub>2</sub> interface</li> </ul>                                                                                         | Present work |
|    | rGO spincoated at Interface         | 8.03 |                                                                                                                                                                                                                                                                                                                                                                        |              |

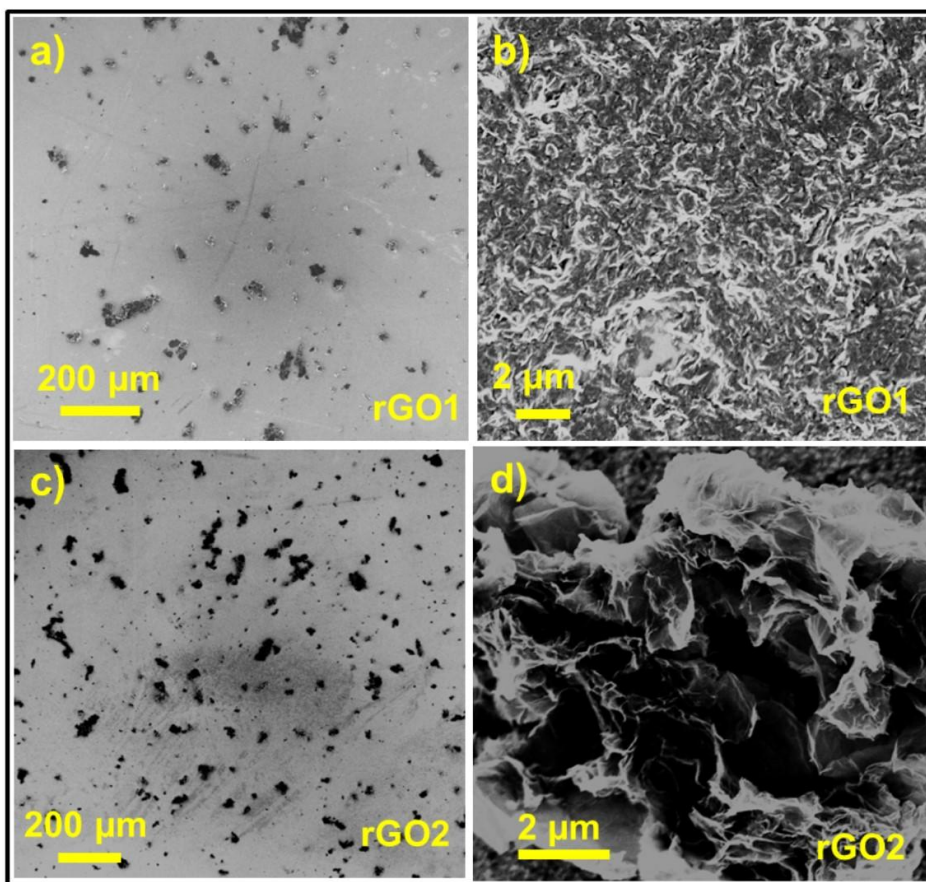

**Figure S1** FESEM images of spin coated rGO1 (a) and rGO2 (c) on FTO after calcination at 500 °C in open air whereby rGO particles are clearly visible with retention of morphology (zoomed-in FESEM images are presented b and d). Calcination was carried out to check the sustainability of rGO materials in photoanode fabrication process.

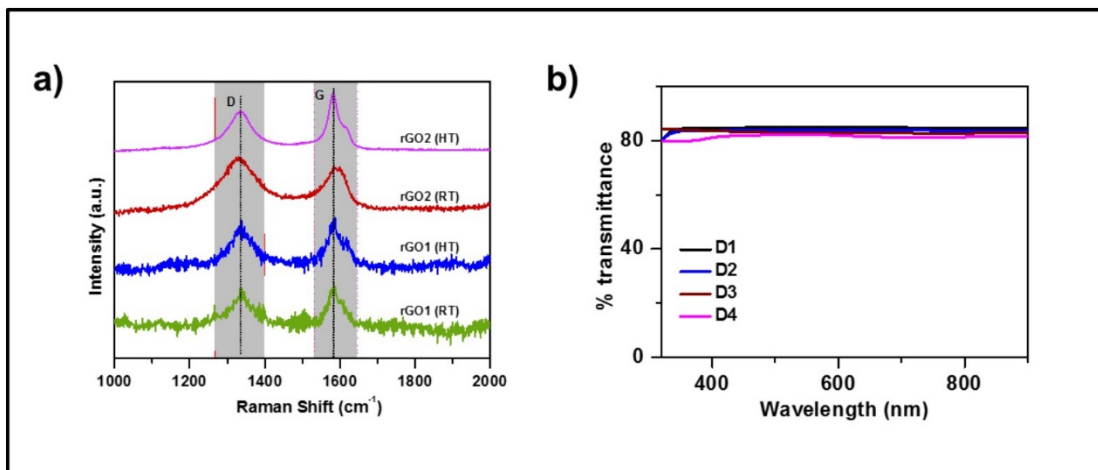

**Figure S2** (a) Raman spectra of rGO1 and rGO2 where RT indicate before heating and HT after heating at 500 °C in open air, respectively. (b) Absorbance spectra of blank FTO (D1), TiCl<sub>4</sub> treated (D2), spin coated rGO1 (D3) and rGO2 (D4) systems.

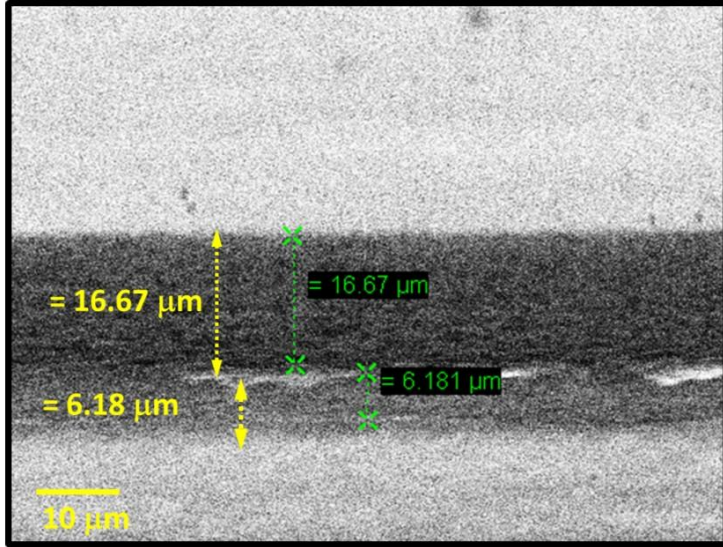

**Figure S3** Cross-sectional FESEM image of the photoanode of the D3 device.

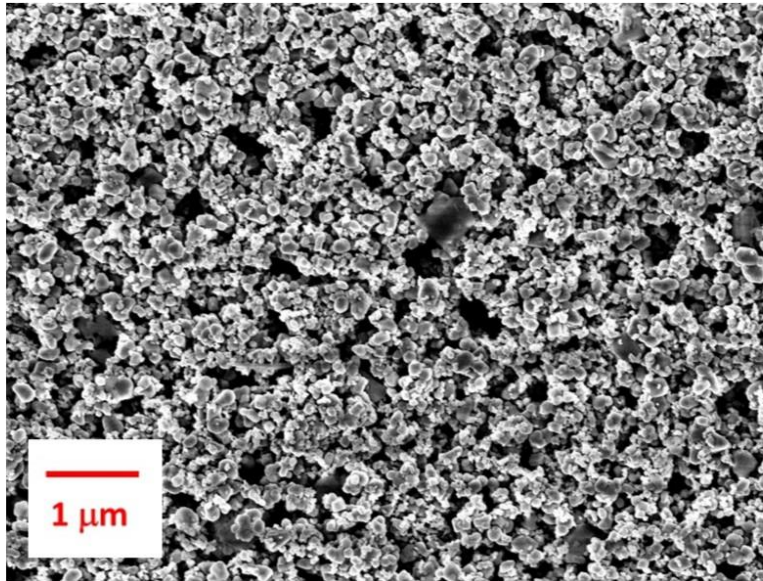

**Figure S4** FESEM image of the photoanode of the D3 device.



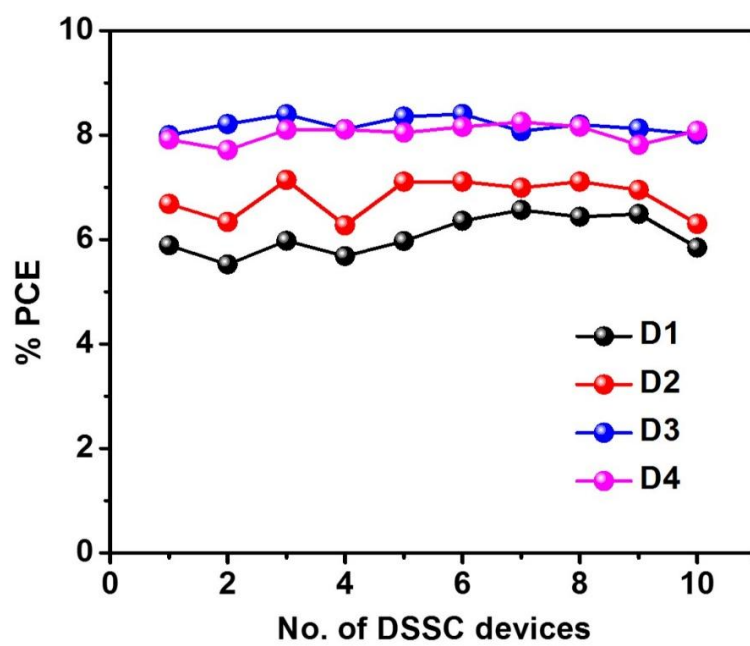

Figure S5 % PCE values of each 10 devices of D1, D2, D3 and D4.

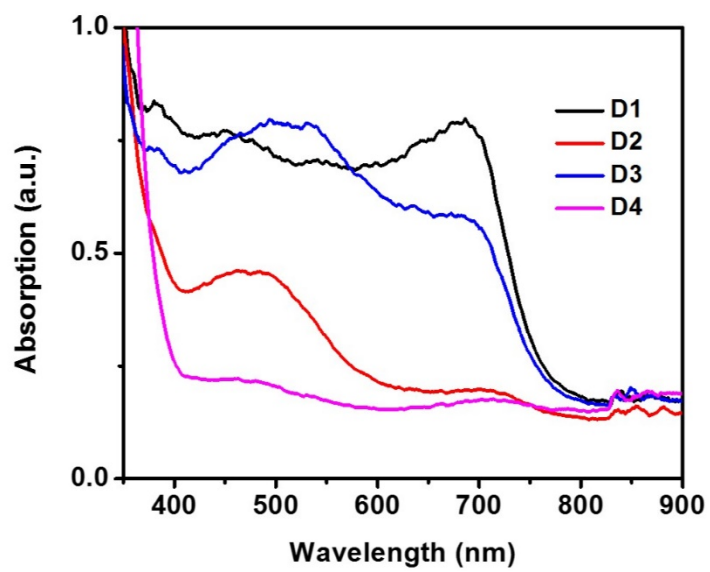

**Figure S6** Solid-state UV-vis spectra of photoanodes of D1, D2, D3 and D4 devices.

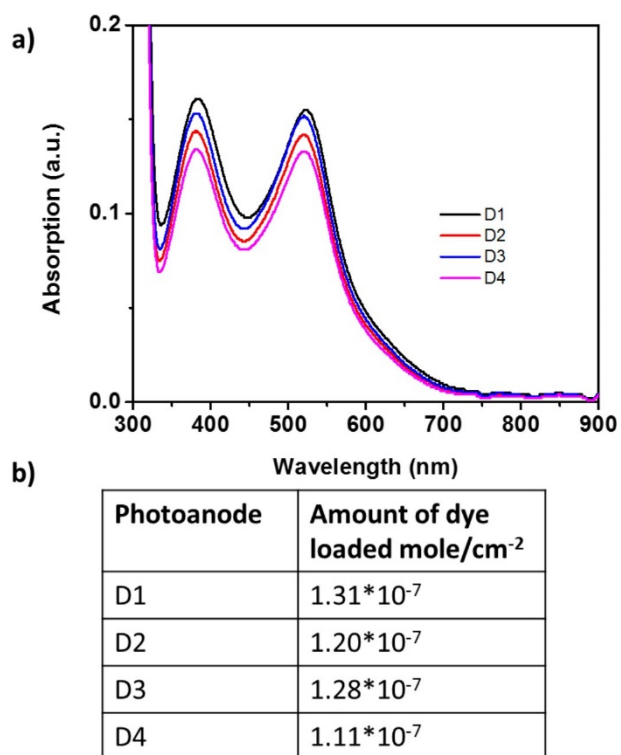

**Figure S7** (a) UV-vis spectra of de-absorbed dye from photoanodes of D1, D2, D3 and D4 devices. (b) Table showing the amount of dye loading in D1, D2, D3 and D4 devices.

## References

- 1 N. Yang, J. Zhai, D. Wang, Y. Chen and L. Jiang, *ACS Nano*, 2010, **4**, 887-894.
- 2 Y. Kusumawati, M. A. Martoprawiro and T. Pauporté, *J. Phys. Chem. C*, 2014, **118**, 9974-9981.
- 3 Y.-B. Tang, C.-S. Lee, J. Xu, Z.-T. Liu, Z.-H. Chen, Z. He, Y.-L. Cao, G. Yuan, H. Song, L. Chen, L. Luo, H.-M. Cheng, W.-J. Zhang, I. Bello and S.-T. Lee, *ACS Nano*, 2010, **4**, 3482-3488.
- 4 U. Mehmood, S. H. A. Ahmad, A. U. H. Khan and A. A. Qaiser, *Solar Ener.*, 2018, **170**, 47-55.
- 5 F. Xu, J. Chen, X. Wu, Y. Zhang, Y. Wang, J. Sun, H. Bi, W. Lei, Y. Ni and L. Sun, *J. Phys. Chem. C*, 2013, **117**, 8619-8627.
- 6 W. Shu, Y. Liu, Z. Peng, K. Chen, C. Zhang and W. Chen, *J. Allo. Compds.*, 2013, **563**, 229-233.
- 7 M.-Y. Yen, M.-C. Hsiao, S.-H. Liao, P.-I. Liu, H.-M. Tsai, C.-C. M. Ma, N.-W. Pu and M.-D. Ger, *Carbon*, 2011, **49**, 3597-3606.
- 8 H. Wang, S. L. Leonard and Y. H. Hu, *Indus. Engn. Chem. Res.*, 2012, **51**, 10613-10620.
- 9 A. Anish Madhavan, S. Kalluri, D. K Chacko, T. A. Arun, S. Nagarajan, K. R. V. Subramanian, A. Sreekumaran Nair, S. V. Nair and A. Balakrishnan, *RSC Adv.*, 2012, **2**, 13032-13037.
